# Supplementary material for: A ratiometric fluorescent chemosensor for fluoride ions based on a proton transfer signaling mechanism
Source: Royal Society of Chemistry journal article supplement (doi:10.1039/b501234a), 2005-01-01
Supplement: b501234a.pdf [file b501234a.pdf]

---

# A Ratiometric Fluorescent Chemosensor for Fluoride Ions based on Proton Transfer Signaling Mechanism

---

Bin Liu and He Tian\*

*Lab of Advanced Materials and Institute of Fine chemicals, East China University of  
Science & Technology, Shanghai, 200237 P. R. China*

*E-mail: tianhe@ecust.edu.cn; Fax: +86-21-64252288; Tel: +86-21-64252756*

## Supplementary Information

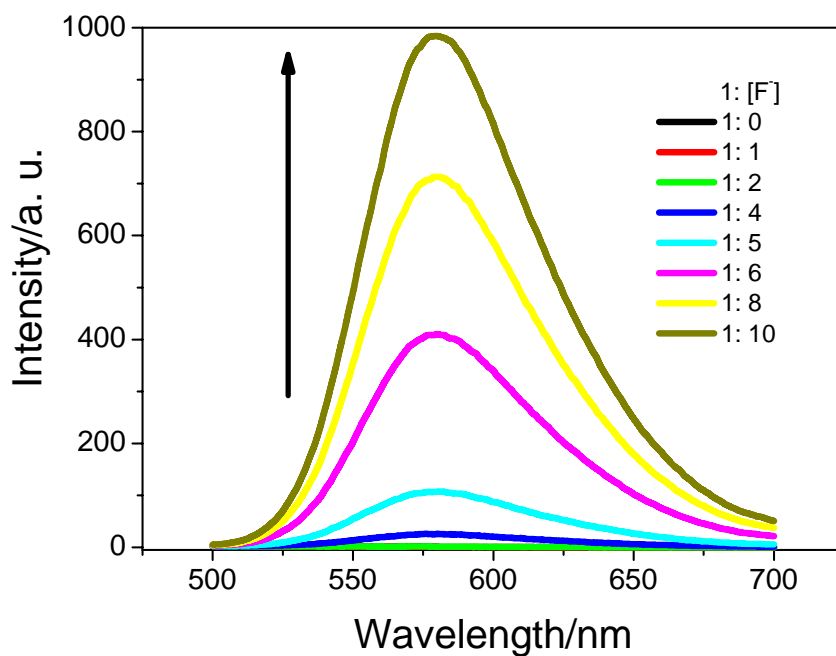

Figure S1. Fluorescence titration spectra of 4-benzoamide-N-butyl-naphthalimide **1** ( $10^{-5}$  mol/L) with TBAF in  $\text{CH}_3\text{CN}$ . Excitation wavelength: 490 nm.

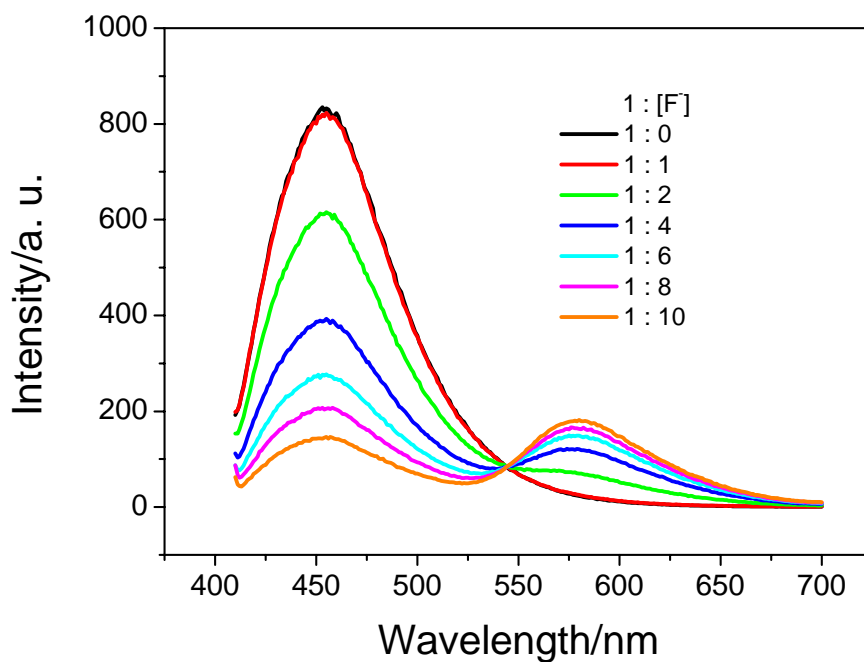

Figure S2. Fluorescence titration spectra of 4-benzoamide-N-butyl-naphthalimide **1** ( $10^{-5}$  mol/L) with TBAF in  $\text{CH}_3\text{CN}$ . Excitation wavelength: 400 nm, another isosbestic wavelength.

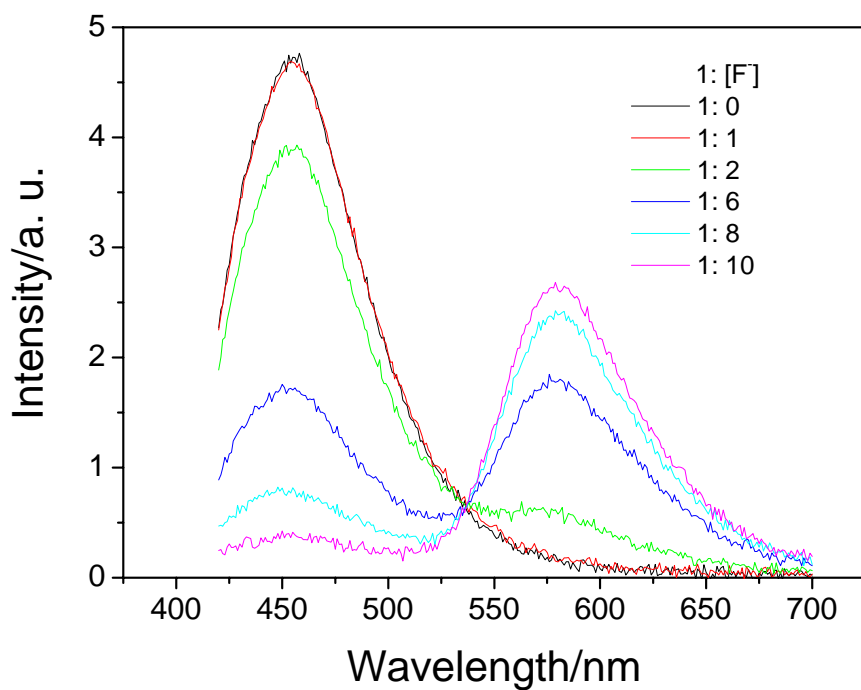

Figure S3. Fluorescence titration spectra of 4-benzoamide-N-butyl-naphthalimide **1** ( $10^{-5}$  mol/L) with TBAF in  $\text{CH}_3\text{CN}$ . Excitation wavelength: 410 nm.

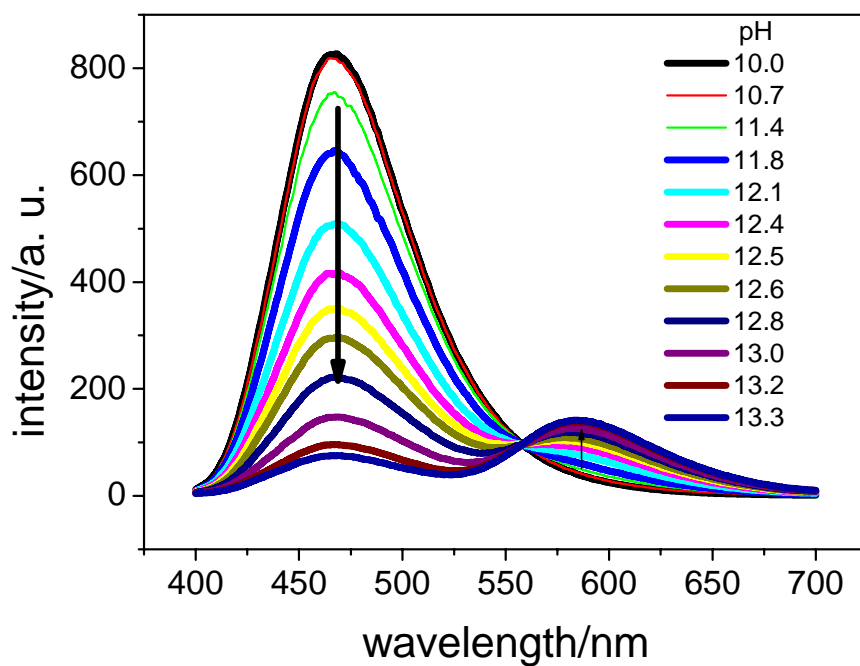

Figure S4. Dependence of the emission spectra of 4-benzoamide-N-butyl-naphthalimide ( $1.53 \times 10^{-5}$  M, acetonitrile: water=1:1[v/v], 298K) on pH ( $\lambda_{\text{ex}} = 385$  nm). The pH was controlled using minimum volumes of sodium hydroxide and hydrochloric acid solutions.

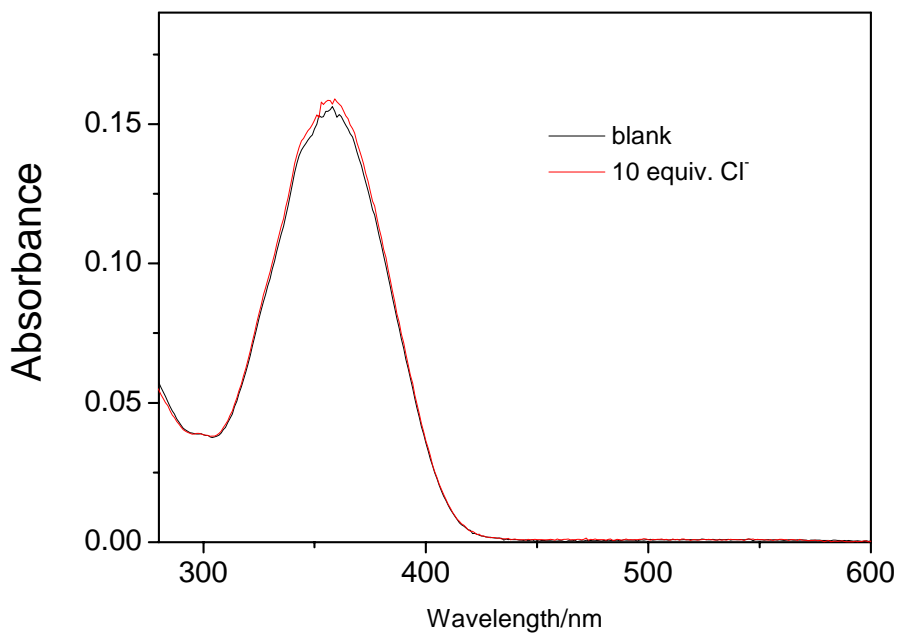

Figure S5. Absorption titration spectra of 4-benzoamide-N-butyl-naphthalimide ( $10^{-5}$  mol/L) with  $\text{Cl}^-$  in  $\text{CH}_3\text{CN}$  at  $20^\circ\text{C}$ .

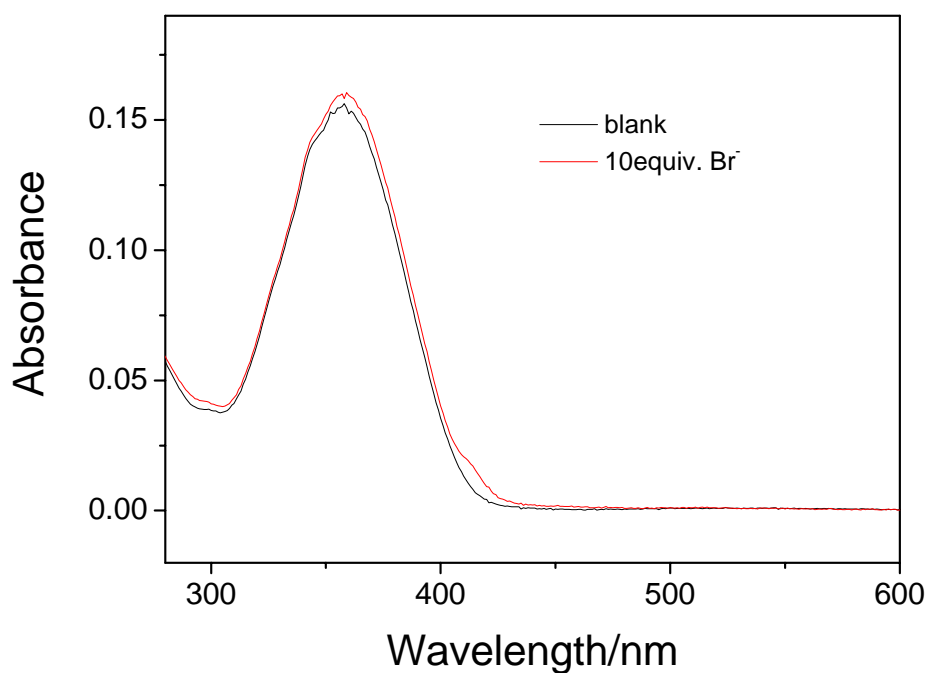

Figure S6. Absorption titration spectra of 4-benzoamide-N-butyl-naphthalimide ( $10^{-5}$  mol/L) with  $\text{Br}^-$  in  $\text{CH}_3\text{CN}$  at  $20^\circ\text{C}$ .

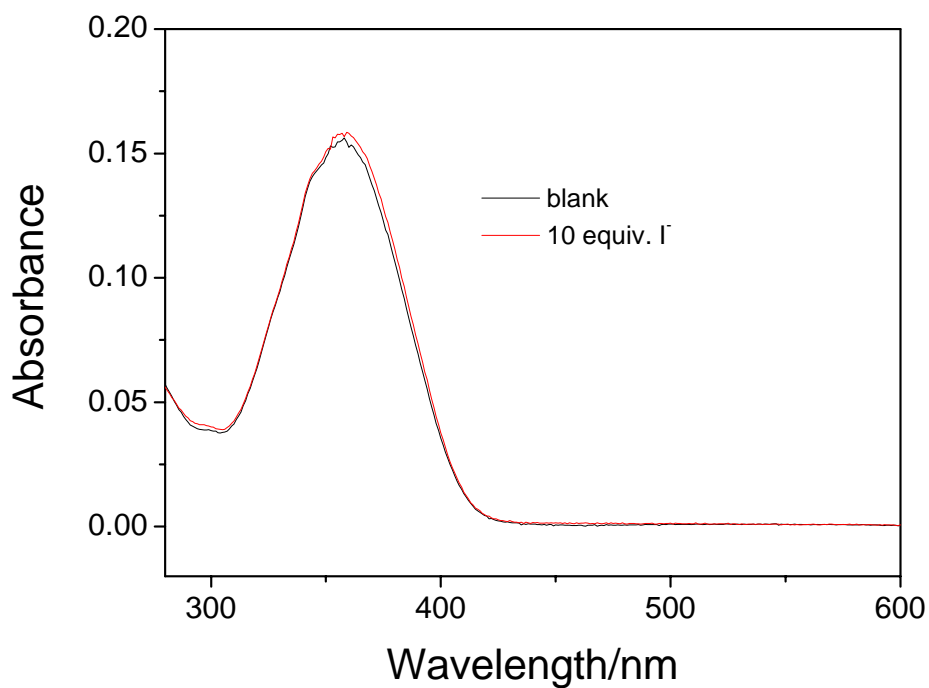

Figure S7. Absorption titration spectra of 4-benzoamide-N-butyl-naphthalimide ( $10^{-5}$  mol/L) with  $\text{I}^-$  in  $\text{CH}_3\text{CN}$  at  $20^\circ\text{C}$ .

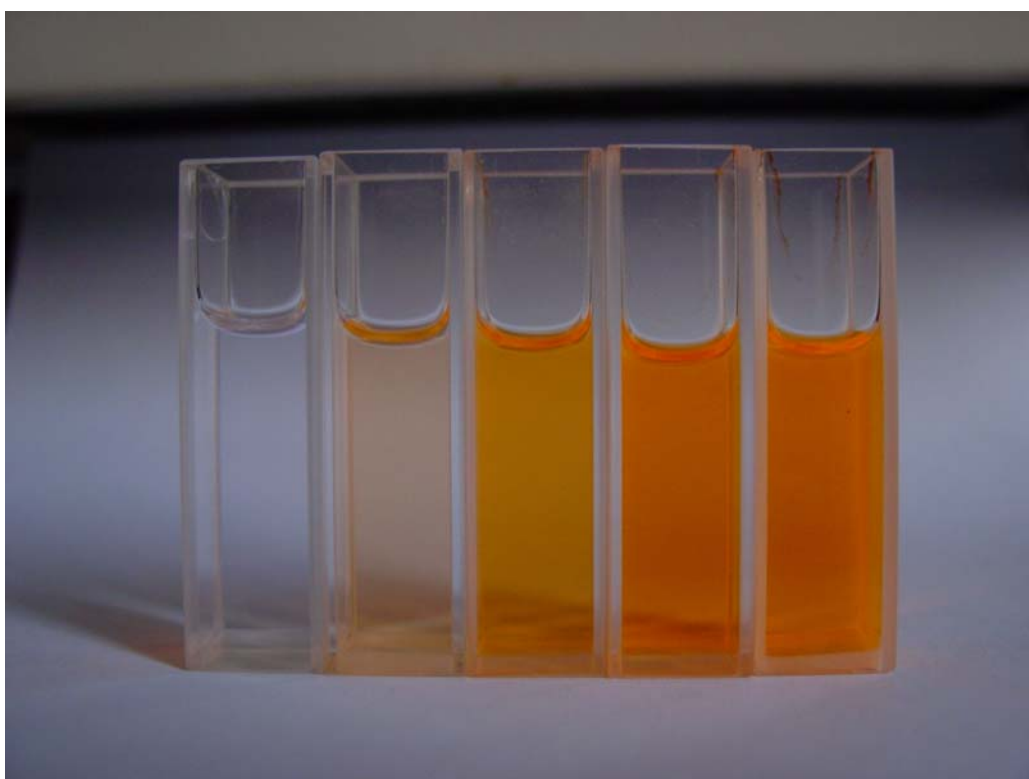

Figure S8. Colour changes observed with the addition of TBAF to an acetonitrile solution of **1**. From left to right: **1**; **1**+F<sup>-</sup>(2equiv.); **1**+F<sup>-</sup>(4equiv.); **1**+F<sup>-</sup>(8equiv.); **1**+F<sup>-</sup>(10equiv.).

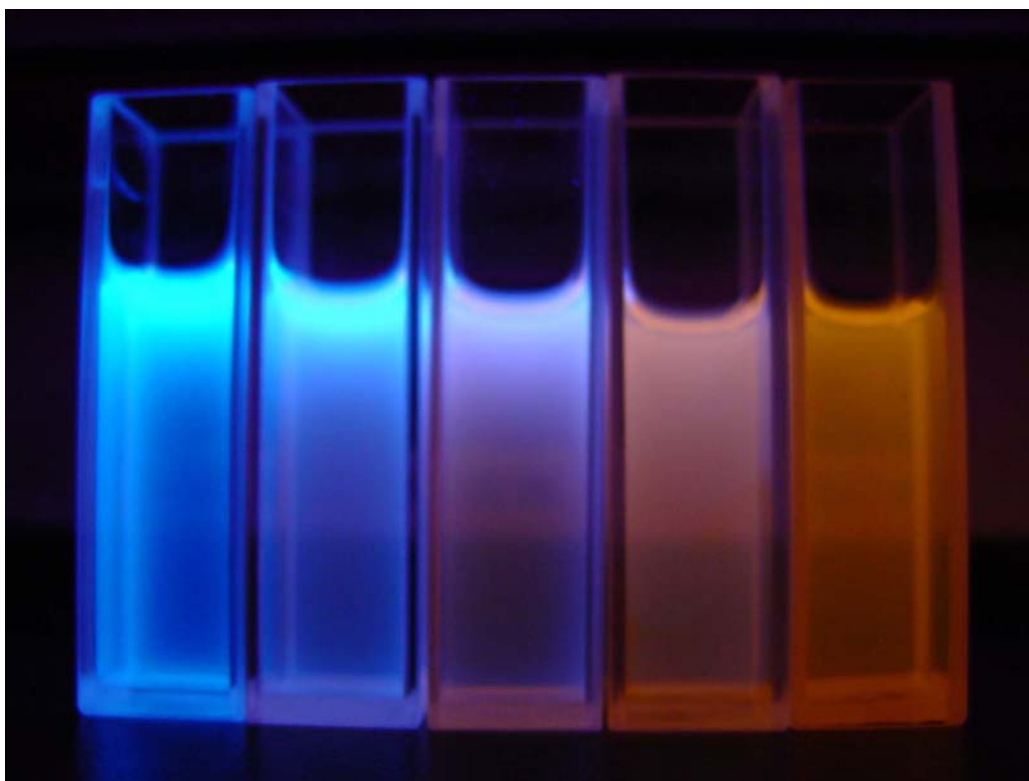

Figure S9. Fluorescent emission colour changes observed with the addition of TBAF to an acetonitrile solution of **1** under UV lamp. From left to right: **1**; **1**+F<sup>-</sup>(2equiv.); **1**+F<sup>-</sup>(4equiv.); **1**+F<sup>-</sup>(8equiv.); **1**+F<sup>-</sup>(10equiv.).

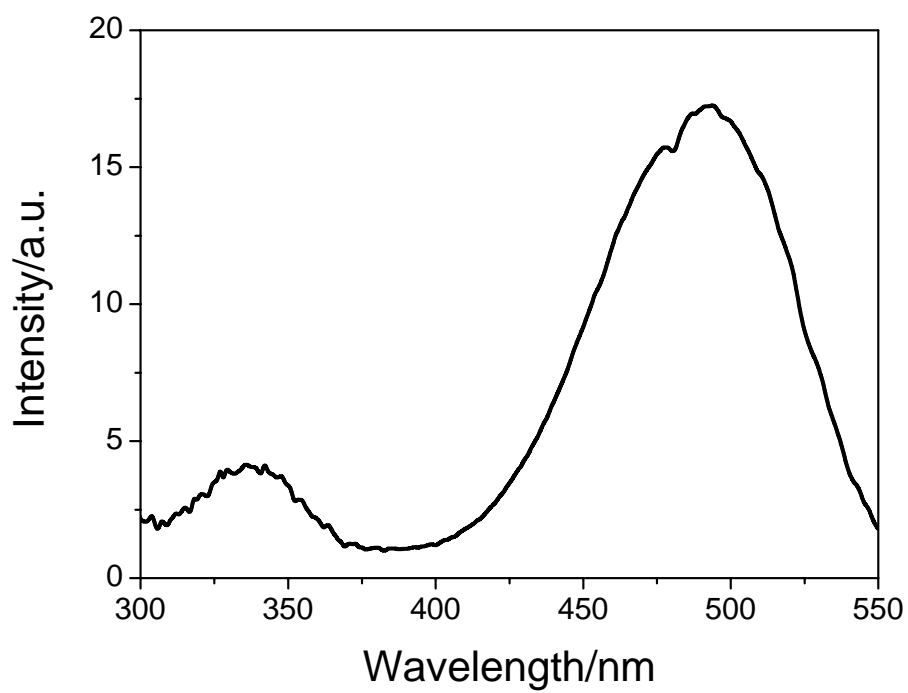

Figure S10. Fluorescence excitation spectra of 4-benzoamide-N-butyl-naphthalimide ( $10^{-5}$  mol/L) with 10equiv.  $F^-$  in  $CH_3CN$  at  $20^\circ C$  ( $\lambda_{em}=583$  nm).
